# Supplementary material for: Peripheral T cell receptor beta immune repertoire is promptly reconstituted after acute myocardial infarction
Source: J Transl Med. 2019 Feb 6;17:40. doi: 10.1186/s12967-019-1788-4 (PMC6366076; doi:10.1186/s12967-019-1788-4)
Supplement: Supplementary file 2 — Additional file 2: Table S1. The analysis of TCRβ immune repertoire sequencing data. [file 12967_2019_1788_MOESM2_ESM.xlsx]

## Sheet: Sheet1
	Beta chain	Total reads	Blast reads	Total CDR3 reads	CDR3 reads/Blast read（%）	CDR3 AA clonotypes
Ctrl group	Sample 1	11061153	3088930	2188792	70.8592	47045
	Sample 2	5129167	3606887	3327383	92.2508	58126
	Sample 3	5429412	3845624	3598901	93.5843	47937
	Sample 4	6223525	3978226	3424793	86.0884	76092
	Sample 5	11118534	2923142	2095791	71.6965	59400
AMI group	Sample 1	9146270	1854703	1561565	84.1949	5706
	Sample 2	8547935	2883375	2559313	88.761	10413
	Sample 3	9259593	2543283	1982920	77.9669	21545
	Sample 4	9195815	2878506	2070673	71.9357	37570
	Sample 5	8366215	2003495	1767456	88.2186	6384
#Total reads=Clean data Reads
